# Supplementary material for: Effects of Consuming Ounce-Equivalent Portions of Animal- vs. Plant-Based Protein Foods, as Defined by the Dietary Guidelines for Americans on Essential Amino Acids Bioavailability in Young and Older Adults: Two Cross-Over Randomized Controlled Trials
Source: MDPI journal article supplement (doi:10.3390/nu15132870), 2023-06-25
Supplement: s1 [file s1]

Effects of consuming ounce equivalent portions of animal- vs. plant-based Protein Foods, as defined by the Dietary Guidelines for Americans on essential amino acids bioavailability in young and older adults: crossover randomized controlled trials. Gavin Connolly

**Title:** Effects of consuming ounce equivalent portions of animal- vs. plant-based Protein Foods, as defined by the Dietary Guidelines for Americans on essential amino acids bioavailability in young and older adults: crossover randomized controlled trials

**First Author:** Gavin Connolly

### **Online Supplementary Tables**

**Table S1.** Energy and macronutrients contents of the food items in the controlled dinner.

**Table S2.** Weight and energy and macronutrients contents of the food items in the test salad.

**Table S3.** Fasting and postprandial amino acids, glucose, and insulin concentrations and positive incremental areas under the curve for young adults.

**Table S4.** Fasting and postprandial amino acids, glucose, and insulin concentrations and positive incremental areas under the curve for older adults.

**Table S5.** Fasting and postprandial amino acids, glucose, and insulin concentrations and positive incremental areas under the curve for young and older adults combined.

**Table S6.** Fasting and postprandial amino acids, glucose, and insulin concentrations and positive incremental areas under the curve for females.

**Table S7.** Fasting and postprandial amino acids, glucose, and insulin concentrations and positive incremental areas under the curve for males.

Effects of consuming ounce equivalent portions of animal- vs. plant-based Protein Foods, as defined by the Dietary Guidelines for Americans on essential amino acids bioavailability in young and older adults: crossover randomized controlled trials. Gavin Connolly

**Table S1.** Energy and macronutrients contents of the food items in the controlled dinner.

| <b>Food item</b>                                           | <b>Energy<br/>(kcal)</b> | <b>Fat<br/>(g)</b> | <b>CHO<br/>(g)</b> | <b>Protein<br/>(g)</b> |
|------------------------------------------------------------|--------------------------|--------------------|--------------------|------------------------|
| Lean Cuisine<br>Favorites Chicken<br>Fettucine (two packs) | 580                      | 11.6               | 85.2               | 31.9                   |
| Hawaiian roll                                              | 100                      | 2.5                | 16.9               | 2.6                    |
| Butter, regular, salted<br>(two packets)                   | 68                       | 7.7                | 0.0                | 0.1                    |
| Medium apple, fresh,<br>with skin                          | 95                       | 0.3                | 25.1               | 0.5                    |
| $\frac{3}{4}$ cup of yellow corn                           | 96                       | 0.8                | 22.9               | 3.0                    |
| Milk, 1% fat, 270 mL                                       | 113                      | 2.6                | 13.5               | 9.1                    |
| <b>Total</b>                                               | <b>1052</b>              | <b>25.5</b>        | <b>163.6</b>       | <b>47.2</b>            |

Effects of consuming ounce equivalent portions of animal- vs. plant-based Protein Foods, as defined by the Dietary Guidelines for Americans on essential amino acids bioavailability in young and older adults: crossover randomized controlled trials. Gavin Connolly

**Table S2.** Weight and energy and macronutrients contents of the food items in the test salad.

| <b>Food item</b>              | <b>Weight</b> | <b>Energy</b> | <b>Fat</b> | <b>CHO</b> | <b>Protein</b> |
|-------------------------------|---------------|---------------|------------|------------|----------------|
|                               | <b>(g)</b>    | <b>(kcal)</b> | <b>(g)</b> | <b>(g)</b> | <b>(g)</b>     |
| Romaine lettuce               | 20            | 3             | 0.1        | 0.7        | 0.2            |
| Mushrooms, raw                | 25            | 6             | 0.1        | 0.8        | 0.8            |
| Croutons                      | 12            | 49            | 0.8        | 8.8        | 1.4            |
| Baby spinach, raw             | 50            | 12            | 0.2        | 1.8        | 1.4            |
| Carrots, raw                  | 62            | 25            | 0.1        | 5.9        | 0.6            |
| Tomato, raw                   | 70            | 13            | 0.1        | 2.7        | 0.6            |
| Broccoli, raw                 | 34            | 12            | 0.1        | 2.3        | 1.0            |
| Balsamic vinaigrette dressing | 31            | 99            | 10         | 2.8        | 0              |
| Total                         |               | 218           | 11.5       | 25.8       | 6              |

Effects of consuming ounce equivalent portions of animal- vs. plant-based Protein Foods, as defined by the Dietary Guidelines for Americans on essential amino acids bioavailability in young and older adults: crossover randomized controlled trials. Gavin Connolly

**Table S3.** Fasting and postprandial amino acids, glucose, and insulin concentrations and positive incremental areas under the curve for young adults.

| Time (mins)        |                       |                       |                       |                       |                       |                       |                       | iAUCpos                    |
|--------------------|-----------------------|-----------------------|-----------------------|-----------------------|-----------------------|-----------------------|-----------------------|----------------------------|
|                    | 0                     | 30                    | 60                    | 120                   | 180                   | 240                   | 300                   |                            |
| μg/mL <sup>1</sup> |                       |                       |                       |                       |                       |                       |                       | μg/mL*300 min <sup>2</sup> |
| TAAs               |                       |                       |                       |                       |                       |                       |                       |                            |
| Pork               | 396 ± 10 <sup>a</sup> | 426 ± 10 <sup>a</sup> | 451 ± 10 <sup>a</sup> | 473 ± 10 <sup>a</sup> | 450 ± 10 <sup>a</sup> | 410 ± 10 <sup>a</sup> | 391 ± 10 <sup>a</sup> | 14671 ± 939 <sup>a</sup>   |
| Egg                | 385 ± 9 <sup>a</sup>  | 413 ± 9 <sup>a</sup>  | 445 ± 9 <sup>ab</sup> | 447 ± 9 <sup>b</sup>  | 431 ± 9 <sup>a</sup>  | 396 ± 9 <sup>ab</sup> | 385 ± 9 <sup>a</sup>  | 9870 ± 963 <sup>b</sup>    |
| Black beans        | 392 ± 8 <sup>a</sup>  | 402 ± 8 <sup>a</sup>  | 413 ± 8 <sup>c</sup>  | 406 ± 8 <sup>c</sup>  | 399 ± 8 <sup>b</sup>  | 386 ± 8 <sup>b</sup>  | 381 ± 8 <sup>a</sup>  | 6447 ± 941 <sup>c</sup>    |
| Almonds            | 397 ± 8 <sup>a</sup>  | 417 ± 8 <sup>a</sup>  | 406 ± 8 <sup>bc</sup> | 399 ± 8 <sup>c</sup>  | 385 ± 8 <sup>b</sup>  | 379 ± 8 <sup>ab</sup> | 367 ± 8 <sup>a</sup>  | 4189 ± 940 <sup>c</sup>    |
| EAAs               |                       |                       |                       |                       |                       |                       |                       |                            |
| Pork               | 129 ± 3 <sup>a</sup>  | 141 ± 3 <sup>a</sup>  | 152 ± 3 <sup>a</sup>  | 171 ± 3 <sup>a</sup>  | 161 ± 3 <sup>a</sup>  | 144 ± 3 <sup>a</sup>  | 134 ± 3 <sup>a</sup>  | 7346 ± 401 <sup>a</sup>    |
| Egg                | 130 ± 3 <sup>a</sup>  | 139 ± 3 <sup>a</sup>  | 147 ± 3 <sup>a</sup>  | 158 ± 3 <sup>b</sup>  | 153 ± 3 <sup>a</sup>  | 137 ± 3 <sup>a</sup>  | 130 ± 3 <sup>a</sup>  | 4689 ± 413 <sup>b</sup>    |
| Black beans        | 124 ± 2 <sup>a</sup>  | 131 ± 2 <sup>b</sup>  | 132 ± 2 <sup>b</sup>  | 132 ± 2 <sup>c</sup>  | 131 ± 2 <sup>b</sup>  | 125 ± 2 <sup>b</sup>  | 121 ± 2 <sup>b</sup>  | 2023 ± 402 <sup>c</sup>    |
| Almonds            | 130 ± 2 <sup>a</sup>  | 137 ± 2 <sup>ab</sup> | 133 ± 2 <sup>b</sup>  | 126 ± 2 <sup>c</sup>  | 127 ± 2 <sup>b</sup>  | 124 ± 2 <sup>b</sup>  | 122 ± 2 <sup>b</sup>  | 1184 ± 401 <sup>c</sup>    |
| BCAAs              |                       |                       |                       |                       |                       |                       |                       |                            |
| Pork               | 56 ± 2 <sup>a</sup>   | 60 ± 2 <sup>a</sup>   | 64 ± 2 <sup>a</sup>   | 74 ± 2 <sup>a</sup>   | 71 ± 2 <sup>a</sup>   | 64 ± 2 <sup>a</sup>   | 60 ± 2 <sup>a</sup>   | 3336 ± 200 <sup>a</sup>    |
| Egg                | 56 ± 2 <sup>a</sup>   | 61 ± 2 <sup>a</sup>   | 64 ± 2 <sup>a</sup>   | 70 ± 2 <sup>a</sup>   | 70 ± 2 <sup>a</sup>   | 62 ± 2 <sup>a</sup>   | 59 ± 2 <sup>a</sup>   | 2719 ± 206 <sup>b</sup>    |
| Black beans        | 54 ± 1 <sup>a</sup>   | 57 ± 1 <sup>a</sup>   | 56 ± 1 <sup>b</sup>   | 56 ± 1 <sup>b</sup>   | 56 ± 1 <sup>b</sup>   | 54 ± 1 <sup>b</sup>   | 52 ± 1 <sup>b</sup>   | 716 ± 201 <sup>c</sup>     |
| Almonds            | 57 ± 1 <sup>a</sup>   | 60 ± 1 <sup>a</sup>   | 57 ± 1 <sup>b</sup>   | 54 ± 1 <sup>b</sup>   | 54 ± 1 <sup>b</sup>   | 54 ± 1 <sup>b</sup>   | 53 ± 1 <sup>b</sup>   | 558 ± 200 <sup>c</sup>     |
| Leucine            |                       |                       |                       |                       |                       |                       |                       |                            |
| Pork               | 18 ± 1 <sup>a</sup>   | 19 ± 1 <sup>a</sup>   | 21 ± 1 <sup>a</sup>   | 24 ± 1 <sup>a</sup>   | 23 ± 1 <sup>a</sup>   | 20 ± 1 <sup>a</sup>   | 19 ± 1 <sup>a</sup>   | 1118 ± 63 <sup>a</sup>     |
| Egg                | 18 ± 1 <sup>a</sup>   | 19 ± 1 <sup>a</sup>   | 20 ± 1 <sup>a</sup>   | 22 ± 1 <sup>b</sup>   | 21 ± 1 <sup>a</sup>   | 19 ± 1 <sup>ab</sup>  | 17 ± 1 <sup>ab</sup>  | 753 ± 65 <sup>b</sup>      |
| Black beans        | 18 ± 1 <sup>a</sup>   | 18 ± 1 <sup>a</sup>   | 18 ± 1 <sup>b</sup>   | 17 ± 1 <sup>c</sup>   | 17 ± 1 <sup>b</sup>   | 17 ± 1 <sup>bc</sup>  | 16 ± 1 <sup>b</sup>   | 201 ± 64 <sup>c</sup>      |
| Almonds            | 18 ± 1 <sup>a</sup>   | 19 ± 1 <sup>a</sup>   | 18 ± 1 <sup>b</sup>   | 16 ± 1 <sup>c</sup>   | 17 ± 1 <sup>b</sup>   | 17 ± 1 <sup>c</sup>   | 17 ± 1 <sup>b</sup>   | 143 ± 63 <sup>c</sup>      |
| mg/dL              |                       |                       |                       |                       |                       |                       |                       | mg/dL*300 min              |
| Glucose            |                       |                       |                       |                       |                       |                       |                       |                            |
| Pork               | 79 ± 2 <sup>a</sup>   | 88 ± 2 <sup>a</sup>   | 79 ± 2 <sup>abc</sup> | 79 ± 2 <sup>abc</sup> | 80 ± 2 <sup>a</sup>   | 83 ± 2 <sup>a</sup>   | 82 ± 2 <sup>a</sup>   | 1262 ± 164 <sup>a</sup>    |
| Egg                | 78 ± 1 <sup>a</sup>   | 89 ± 1 <sup>a</sup>   | 77 ± 1 <sup>ab</sup>  | 76 ± 1 <sup>ab</sup>  | 78 ± 1 <sup>a</sup>   | 80 ± 1 <sup>a</sup>   | 79 ± 1 <sup>a</sup>   | 1165 ± 169 <sup>a</sup>    |
| Black beans        | 81 ± 2 <sup>a</sup>   | 90 ± 2 <sup>a</sup>   | 83 ± 2 <sup>ac</sup>  | 79 ± 2 <sup>abc</sup> | 79 ± 2 <sup>a</sup>   | 81 ± 2 <sup>a</sup>   | 80 ± 2 <sup>a</sup>   | 1044 ± 165 <sup>a</sup>    |
| Almonds            | 81 ± 1 <sup>a</sup>   | 87 ± 1 <sup>a</sup>   | 81 ± 1 <sup>abc</sup> | 80 ± 1 <sup>ac</sup>  | 79 ± 1 <sup>a</sup>   | 82 ± 1 <sup>a</sup>   | 82 ± 1 <sup>a</sup>   | 889 ± 164 <sup>a</sup>     |
| μIU/mL             |                       |                       |                       |                       |                       |                       |                       | μIU/mL*300 min             |

Effects of consuming ounce equivalent portions of animal- vs. plant-based Protein Foods, as defined by the Dietary Guidelines for Americans on essential amino acids bioavailability in young and older adults: crossover randomized controlled trials. Gavin Connolly

|                    |                  |                  |                    |                  |                  |                  |                  |                         |
|--------------------|------------------|------------------|--------------------|------------------|------------------|------------------|------------------|-------------------------|
| <b>Insulin</b>     |                  |                  |                    |                  |                  |                  |                  |                         |
| <b>Pork</b>        | 14.0 ±           | 35.2 ±           | 31.1 ±             | 20.9 ±           | 14.8 ±           | 12.1 ±           | 9.3 ±            | 2139 ± 232 <sup>a</sup> |
|                    | 2.4 <sup>a</sup> | 2.3 <sup>a</sup> | 2.3 <sup>abc</sup> | 2.3 <sup>a</sup> | 2.3 <sup>a</sup> | 2.3 <sup>a</sup> | 2.3 <sup>a</sup> |                         |
| <b>Egg</b>         | 10.3 ±           | 33.3 ±           | 25.0 ±             | 15.2 ±           | 12.6 ±           | 8.2 ±            | 7.2 ±            | 1946 ± 237 <sup>a</sup> |
|                    | 1.8 <sup>a</sup> | 1.8 <sup>a</sup> | 1.8 <sup>ab</sup>  | 1.8 <sup>a</sup> | 1.8 <sup>a</sup> | 1.8 <sup>a</sup> | 1.8 <sup>a</sup> |                         |
| <b>Black beans</b> | 12.1 ±           | 34.5 ±           | 31.0 ±             | 18.6 ±           | 14.5 ±           | 10.5 ±           | 9.3 ±            | 2181 ± 232 <sup>a</sup> |
|                    | 2.0 <sup>a</sup> | 2.0 <sup>a</sup> | 2.0 <sup>ac</sup>  | 2.0 <sup>a</sup> | 2.0 <sup>a</sup> | 2.0 <sup>a</sup> | 2.0 <sup>a</sup> |                         |
| <b>Almonds</b>     | 11.8 ±           | 32.7 ±           | 25.3 ±             | 15.9 ±           | 10.7 ±           | 10.5 ±           | 9.3 ±            | 1892 ± 232 <sup>a</sup> |
|                    | 1.9 <sup>a</sup> | 1.9 <sup>a</sup> | 1.9 <sup>abc</sup> | 1.9 <sup>a</sup> | 1.9 <sup>a</sup> | 1.9 <sup>a</sup> | 1.9 <sup>a</sup> |                         |

<sup>1</sup> Values are least-squares means ± SE; n = 30 (15 females, 15 males). Plasma amino acids, glucose, and insulin concentrations were measured over 300 minutes. Data were analyzed using a doubly repeated measures ANOVA (proc mixed; SAS version 9.3). Differences in means were determined using a Bonferroni post hoc test. Trial-by-time interactions for TAAs, EAAs, BCAAs, leucine, and NEAAs were all significant, Tukey adjusted  $P < .001$ . TAA, total amino acids (sum of Ala, Arg, Apn, Asp, Cys, Gln, Glu, Gly, His, Ile, Leu, Lys, Met, Phe, Pro, Ser, Thr, Trp, Tyr, and Val); EAAs, essential amino acids (sum of His, Ile, Leu, Lys, Met, Phe, Thr, Trp, and Val); BCAAs, branched-chain amino acids (sum of Leu, Ile, and Val); NEAA, non-essential amino acids (sum of Ala, Arg, Asn, Asp, Cys, Gln, Glu, Gly, Pro, Ser, and Tyr); iAUCpos, positive incremental area under the curve.

<sup>2</sup> Values are least-squares means ± SE. Plasma amino acids, glucose, and insulin iAUCpos are reported over the 300-minute postprandial period with 0 minute time point used as baseline. Data were analyzed using a repeated measures ANOVA (proc mixed; SAS version 9.3) and differences in means were determined using a Bonferroni post hoc test, Bonferroni adjusted  $P < 0.001$ .

<sup>3</sup> Different superscript letters are significantly different from each other within time point, Bonferroni adjusted  $P < 0.05$ ; n = 30 (15 females, 15 males).

Effects of consuming ounce equivalent portions of animal- vs. plant-based Protein Foods, as defined by the Dietary Guidelines for Americans on essential amino acids bioavailability in young and older adults: crossover randomized controlled trials. Gavin Connolly

**Table S4.** Fasting and postprandial amino acids, glucose, and insulin concentrations and positive incremental areas under the curve for older adults.

|             | Time (mins)          |                       |                        |                      |                      |                        |                       | iAUCpos                                  |
|-------------|----------------------|-----------------------|------------------------|----------------------|----------------------|------------------------|-----------------------|------------------------------------------|
|             | 0                    | 30                    | 60                     | 120                  | 180                  | 240                    | 300                   |                                          |
|             | $\mu\text{g/mL}^1$   |                       |                        |                      |                      |                        |                       | $\mu\text{g/mL} \cdot 300 \text{ min}^2$ |
| TAAs        |                      |                       |                        |                      |                      |                        |                       |                                          |
| Pork        | 386 ± 9 <sup>a</sup> | 419 ± 9 <sup>a</sup>  | 437 ± 9 <sup>abc</sup> | 482 ± 9 <sup>a</sup> | 459 ± 9 <sup>a</sup> | 421 ± 9 <sup>ab</sup>  | 398 ± 9 <sup>a</sup>  | 16314 ± 1377 <sup>a</sup>                |
| Egg         | 389 ± 9 <sup>a</sup> | 411 ± 9 <sup>a</sup>  | 443 ± 9 <sup>ab</sup>  | 450 ± 9 <sup>b</sup> | 437 ± 9 <sup>a</sup> | 411 ± 9 <sup>abc</sup> | 390 ± 9 <sup>a</sup>  | 11113 ± 1394 <sup>b</sup>                |
| Black beans | 388 ± 8 <sup>a</sup> | 403 ± 8 <sup>a</sup>  | 413 ± 8 <sup>ac</sup>  | 413 ± 8 <sup>c</sup> | 400 ± 8 <sup>b</sup> | 389 ± 8 <sup>ac</sup>  | 385 ± 8 <sup>a</sup>  | 6786 ± 1381 <sup>c</sup>                 |
| Almonds     | 386 ± 9 <sup>a</sup> | 411 ± 9 <sup>a</sup>  | 419 ± 9 <sup>abc</sup> | 405 ± 9 <sup>c</sup> | 394 ± 9 <sup>b</sup> | 394 ± 9 <sup>abc</sup> | 380 ± 9 <sup>a</sup>  | 6241 ± 1364 <sup>c</sup>                 |
| EAAs        |                      |                       |                        |                      |                      |                        |                       |                                          |
| Pork        | 110 ± 4 <sup>a</sup> | 121 ± 4 <sup>a</sup>  | 131 ± 4 <sup>a</sup>   | 154 ± 4 <sup>a</sup> | 151 ± 4 <sup>a</sup> | 136 ± 4 <sup>a</sup>   | 127 ± 4 <sup>a</sup>  | 8424 ± 496 <sup>a</sup>                  |
| Egg         | 113 ± 4 <sup>a</sup> | 121 ± 4 <sup>a</sup>  | 133 ± 4 <sup>a</sup>   | 141 ± 4 <sup>b</sup> | 140 ± 4 <sup>a</sup> | 131 ± 4 <sup>a</sup>   | 123 ± 4 <sup>ab</sup> | 5725 ± 502 <sup>b</sup>                  |
| Black beans | 111 ± 2 <sup>a</sup> | 116 ± 2 <sup>a</sup>  | 117 ± 2 <sup>b</sup>   | 116 ± 2 <sup>c</sup> | 115 ± 2 <sup>b</sup> | 113 ± 2 <sup>b</sup>   | 113 ± 2 <sup>bc</sup> | 2084 ± 497 <sup>c</sup>                  |
| Almonds     | 112 ± 3 <sup>a</sup> | 119 ± 3 <sup>a</sup>  | 119 ± 3 <sup>b</sup>   | 115 ± 3 <sup>c</sup> | 111 ± 3 <sup>b</sup> | 113 ± 3 <sup>b</sup>   | 111 ± 3 <sup>c</sup>  | 1368 ± 492 <sup>c</sup>                  |
| BCAAs       |                      |                       |                        |                      |                      |                        |                       |                                          |
| Pork        | 44 ± 2 <sup>a</sup>  | 49 ± 2 <sup>a</sup>   | 53 ± 2 <sup>a</sup>    | 63 ± 2 <sup>a</sup>  | 65 ± 2 <sup>a</sup>  | 59 ± 2 <sup>a</sup>    | 56 ± 2 <sup>a</sup>   | 4268 ± 256 <sup>a</sup>                  |
| Egg         | 46 ± 2 <sup>a</sup>  | 49 ± 2 <sup>a</sup>   | 54 ± 2 <sup>a</sup>    | 59 ± 2 <sup>b</sup>  | 61 ± 2 <sup>a</sup>  | 57 ± 2 <sup>a</sup>    | 55 ± 2 <sup>a</sup>   | 3145 ± 259 <sup>b</sup>                  |
| Black beans | 45 ± 1 <sup>a</sup>  | 47 ± 1 <sup>a</sup>   | 46 ± 1 <sup>b</sup>    | 46 ± 1 <sup>c</sup>  | 46 ± 1 <sup>b</sup>  | 47 ± 1 <sup>b</sup>    | 48 ± 1 <sup>b</sup>   | 866 ± 256 <sup>c</sup>                   |
| Almonds     | 45 ± 1 <sup>a</sup>  | 48 ± 1 <sup>a</sup>   | 47 ± 1 <sup>b</sup>    | 45 ± 1 <sup>c</sup>  | 45 ± 1 <sup>b</sup>  | 47 ± 1 <sup>b</sup>    | 47 ± 1 <sup>b</sup>   | 675 ± 254 <sup>c</sup>                   |
| Leucine     |                      |                       |                        |                      |                      |                        |                       |                                          |
| Pork        | 14 ± 1 <sup>a</sup>  | 16 ± 1 <sup>a</sup>   | 17 ± 1 <sup>a</sup>    | 21 ± 1 <sup>a</sup>  | 21 ± 1 <sup>a</sup>  | 19 ± 1 <sup>a</sup>    | 18 ± 1 <sup>a</sup>   | 1462 ± 88 <sup>a</sup>                   |
| Egg         | 14 ± 1 <sup>a</sup>  | 16 ± 1 <sup>a</sup>   | 17 ± 1 <sup>a</sup>    | 19 ± 1 <sup>b</sup>  | 19 ± 1 <sup>b</sup>  | 18 ± 1 <sup>a</sup>    | 17 ± 1 <sup>ab</sup>  | 972 ± 89 <sup>b</sup>                    |
| Black beans | 14 ± 1 <sup>a</sup>  | 15 ± 1 <sup>a</sup>   | 15 ± 1 <sup>b</sup>    | 14 ± 1 <sup>c</sup>  | 14 ± 1 <sup>c</sup>  | 15 ± 1 <sup>b</sup>    | 15 ± 1 <sup>bcd</sup> | 284 ± 88 <sup>c</sup>                    |
| Almonds     | 14 ± 1 <sup>a</sup>  | 16 ± 1 <sup>a</sup>   | 15 ± 1 <sup>b</sup>    | 14 ± 1 <sup>c</sup>  | 14 ± 1 <sup>c</sup>  | 15 ± 1 <sup>b</sup>    | 15 ± 1 <sup>cd</sup>  | 195 ± 87 <sup>c</sup>                    |
|             | $\text{mg/dL}$       |                       |                        |                      |                      |                        |                       | $\text{mg/dL} \cdot 300 \text{ min}$     |
| Glucose     |                      |                       |                        |                      |                      |                        |                       |                                          |
| Pork        | 76 ± 2 <sup>a</sup>  | 88 ± 2 <sup>a</sup>   | 83 ± 2 <sup>a</sup>    | 77 ± 2 <sup>a</sup>  | 81 ± 2 <sup>a</sup>  | 82 ± 2 <sup>a</sup>    | 83 ± 2 <sup>a</sup>   | 2001 ± 263 <sup>a</sup>                  |
| Egg         | 79 ± 3 <sup>a</sup>  | 87 ± 3 <sup>abc</sup> | 84 ± 3 <sup>a</sup>    | 78 ± 3 <sup>a</sup>  | 80 ± 3 <sup>a</sup>  | 83 ± 3 <sup>a</sup>    | 85 ± 3 <sup>a</sup>   | 1609 ± 266 <sup>a</sup>                  |
| Black beans | 78 ± 3 <sup>a</sup>  | 90 ± 3 <sup>bc</sup>  | 89 ± 3 <sup>a</sup>    | 79 ± 3 <sup>a</sup>  | 79 ± 3 <sup>a</sup>  | 80 ± 3 <sup>a</sup>    | 82 ± 3 <sup>a</sup>   | 2091 ± 263 <sup>a</sup>                  |
| Almonds     | 79 ± 2 <sup>a</sup>  | 88 ± 2 <sup>abc</sup> | 84 ± 2 <sup>a</sup>    | 80 ± 2 <sup>a</sup>  | 79 ± 2 <sup>a</sup>  | 81 ± 2 <sup>a</sup>    | 82 ± 2 <sup>a</sup>   | 1472 ± 261 <sup>a</sup>                  |
|             | $\mu\text{IU/mL}$    |                       |                        |                      |                      |                        |                       | $\mu\text{IU/mL} \cdot 300 \text{ min}$  |

Effects of consuming ounce equivalent portions of animal- vs. plant-based Protein Foods, as defined by the Dietary Guidelines for Americans on essential amino acids bioavailability in young and older adults: crossover randomized controlled trials. Gavin Connolly

|                    |                  |                  |                    |                  |                  |                  |                  |                         |
|--------------------|------------------|------------------|--------------------|------------------|------------------|------------------|------------------|-------------------------|
| <b>Insulin</b>     |                  |                  |                    |                  |                  |                  |                  |                         |
| <b>Pork</b>        | 8.3 ±            | 24.1 ±           | 26.7 ±             | 13.6 ±           | 10.1 ±           | 6.4 ±            | 6.0 ±            | 1819 ± 236 <sup>a</sup> |
|                    | 1.5 <sup>a</sup> | 1.5 <sup>a</sup> | 1.5 <sup>abc</sup> | 1.5 <sup>a</sup> | 1.5 <sup>a</sup> | 1.5 <sup>a</sup> | 1.5 <sup>a</sup> |                         |
| <b>Egg</b>         | 9.4 ±            | 22.8 ±           | 23.5 ±             | 13.8 ±           | 10.3 ±           | 8.3 ±            | 7.5 ±            | 1530 ± 239 <sup>a</sup> |
|                    | 1.4 <sup>a</sup> | 1.4 <sup>a</sup> | 1.4 <sup>abd</sup> | 1.4 <sup>a</sup> | 1.4 <sup>a</sup> | 1.4 <sup>a</sup> | 1.4 <sup>a</sup> |                         |
| <b>Black beans</b> | 8.1 ±            | 24.6 ±           | 29.4 ±             | 13.6 ±           | 8.6 ±            | 7.0 ±            | 6.5 ±            | 1930 ± 237 <sup>a</sup> |
|                    | 1.8 <sup>a</sup> | 1.8 <sup>a</sup> | 1.8 <sup>c</sup>   | 2.0 <sup>a</sup> | 1.8 <sup>a</sup> | 1.8 <sup>a</sup> | 1.8 <sup>a</sup> |                         |
| <b>Almonds</b>     | 8.3 ±            | 25.8 ±           | 21.7 ±             | 10.6 ±           | 7.6 ±            | 6.4 ±            | 6.3 ±            | 1301 ± 236 <sup>a</sup> |
|                    | 1.5 <sup>a</sup> | 1.5 <sup>a</sup> | 1.5 <sup>d</sup>   | 1.5 <sup>a</sup> | 1.5 <sup>a</sup> | 1.5 <sup>a</sup> | 1.5 <sup>a</sup> |                         |

<sup>1</sup> Values are least-squares means ± SE; n = 25 (15 females, 10 males). Plasma amino acids, glucose, and insulin concentrations were measured over 300 minutes. Data were analyzed using a doubly repeated measures ANOVA (proc mixed; SAS version 9.3). Differences in means were determined using a Bonferroni post hoc test. Trial-by-time interactions for TAAs, EAAs, BCAAs, leucine, and NEAAs were all significant, Tukey adjusted  $P < .001$ . TAA, total amino acids (sum of Ala, Arg, Apn, Asp, Cys, Gln, Glu, Gly, His, Ile, Leu, Lys, Met, Phe, Pro, Ser, Thr, Trp, Tyr, and Val); EAAs, essential amino acids (sum of His, Ile, Leu, Lys, Met, Phe, Thr, Trp, and Val); BCAAs, branched-chain amino acids (sum of Leu, Ile, and Val); NEAA, non-essential amino acids (sum of Ala, Arg, Asn, Asp, Cys, Gln, Glu, Gly, Pro, Ser, and Tyr); iAUCpos, positive incremental area under the curve.

<sup>2</sup> Values are least-squares means ± SE. Plasma amino acids, glucose, and insulin iAUCpos are reported over the 300-minute postprandial period with 0 minute time point used as baseline. Data were analyzed using a repeated measures ANOVA (proc mixed; SAS version 9.3) and differences in means were determined using a Bonferroni post hoc test, Bonferroni adjusted  $P < 0.05$ .

<sup>3</sup> Different superscript letters are significantly different from each other within time point, Bonferroni adjusted  $P < 0.05$ ; n = 25 (15 females, 10 males).

Effects of consuming ounce equivalent portions of animal- vs. plant-based Protein Foods, as defined by the Dietary Guidelines for Americans on essential amino acids bioavailability in young and older adults: crossover randomized controlled trials. Gavin Connolly

**Table S5.** Fasting and postprandial amino acids, glucose, and insulin concentrations and positive incremental areas under the curve for young and older adults combined.

|             | Time (mins)          |                        |                      |                      |                      |                       | iAUCpos                    |                          |
|-------------|----------------------|------------------------|----------------------|----------------------|----------------------|-----------------------|----------------------------|--------------------------|
|             | 0                    | 30                     | 60                   | 120                  | 180                  | 240                   | 300                        |                          |
|             | μg/mL <sup>1</sup>   |                        |                      |                      |                      |                       | μg/mL*300 min <sup>2</sup> |                          |
| TAAs        |                      |                        |                      |                      |                      |                       |                            |                          |
| Pork        | 384 ± 7 <sup>a</sup> | 415 ± 7 <sup>a</sup>   | 436 ± 7 <sup>a</sup> | 476 ± 7 <sup>a</sup> | 449 ± 7 <sup>a</sup> | 411 ± 7 <sup>a</sup>  | 388 ± 7 <sup>a</sup>       | 15508 ± 803 <sup>a</sup> |
| Egg         | 384 ± 6 <sup>a</sup> | 408 ± 6 <sup>abc</sup> | 434 ± 6 <sup>a</sup> | 444 ± 6 <sup>b</sup> | 430 ± 6 <sup>b</sup> | 400 ± 6 <sup>ab</sup> | 380 ± 6 <sup>a</sup>       | 10603 ± 820 <sup>b</sup> |
| Black beans | 378 ± 5 <sup>a</sup> | 397 ± 5 <sup>bc</sup>  | 404 ± 5 <sup>b</sup> | 404 ± 5 <sup>c</sup> | 394 ± 5 <sup>c</sup> | 382 ± 5 <sup>bc</sup> | 374 ± 5 <sup>a</sup>       | 6463 ± 806 <sup>c</sup>  |
| Almonds     | 385 ± 6 <sup>a</sup> | 410 ± 6 <sup>abc</sup> | 412 ± 6 <sup>b</sup> | 396 ± 6 <sup>c</sup> | 390 ± 6 <sup>c</sup> | 382 ± 6 <sup>bc</sup> | 374 ± 6 <sup>a</sup>       | 5252 ± 803 <sup>c</sup>  |
| EAAs        |                      |                        |                      |                      |                      |                       |                            |                          |
| Pork        | 120 ± 2 <sup>a</sup> | 131 ± 2 <sup>a</sup>   | 142 ± 2 <sup>a</sup> | 163 ± 2 <sup>a</sup> | 156 ± 2 <sup>a</sup> | 140 ± 2 <sup>a</sup>  | 131 ± 2 <sup>a</sup>       | 7900 ± 313 <sup>a</sup>  |
| Egg         | 122 ± 2 <sup>a</sup> | 130 ± 2 <sup>a</sup>   | 140 ± 2 <sup>a</sup> | 149 ± 2 <sup>b</sup> | 147 ± 2 <sup>b</sup> | 134 ± 2 <sup>a</sup>  | 127 ± 2 <sup>a</sup>       | 5252 ± 320 <sup>b</sup>  |
| Black beans | 117 ± 2 <sup>a</sup> | 123 ± 2 <sup>b</sup>   | 125 ± 2 <sup>b</sup> | 124 ± 2 <sup>c</sup> | 123 ± 2 <sup>c</sup> | 120 ± 2 <sup>b</sup>  | 117 ± 2 <sup>b</sup>       | 2015 ± 314 <sup>c</sup>  |
| Almonds     | 121 ± 2 <sup>a</sup> | 128 ± 2 <sup>ab</sup>  | 126 ± 2 <sup>b</sup> | 120 ± 2 <sup>c</sup> | 119 ± 2 <sup>c</sup> | 118 ± 2 <sup>b</sup>  | 116 ± 2 <sup>b</sup>       | 1290 ± 313 <sup>c</sup>  |
| BCAAs       |                      |                        |                      |                      |                      |                       |                            |                          |
| Pork        | 50 ± 1 <sup>a</sup>  | 55 ± 1 <sup>a</sup>    | 58 ± 1 <sup>a</sup>  | 69 ± 1 <sup>a</sup>  | 68 ± 1 <sup>a</sup>  | 62 ± 1 <sup>a</sup>   | 58 ± 1 <sup>a</sup>        | 3806 ± 158 <sup>a</sup>  |
| Egg         | 51 ± 1 <sup>a</sup>  | 55 ± 1 <sup>a</sup>    | 59 ± 1 <sup>a</sup>  | 64 ± 1 <sup>b</sup>  | 65 ± 1 <sup>a</sup>  | 60 ± 1 <sup>a</sup>   | 57 ± 1 <sup>a</sup>        | 2959 ± 162 <sup>b</sup>  |
| Black beans | 50 ± 1 <sup>a</sup>  | 52 ± 1 <sup>a</sup>    | 51 ± 1 <sup>b</sup>  | 51 ± 1 <sup>c</sup>  | 51 ± 1 <sup>b</sup>  | 51 ± 1 <sup>b</sup>   | 50 ± 1 <sup>b</sup>        | 775 ± 159 <sup>c</sup>   |
| Almonds     | 51 ± 1 <sup>a</sup>  | 54 ± 1 <sup>a</sup>    | 52 ± 1 <sup>b</sup>  | 49 ± 1 <sup>c</sup>  | 50 ± 1 <sup>b</sup>  | 51 ± 1 <sup>b</sup>   | 50 ± 1 <sup>b</sup>        | 627 ± 158 <sup>c</sup>   |
| Leucine     |                      |                        |                      |                      |                      |                       |                            |                          |
| Pork        | 16 ± 1 <sup>a</sup>  | 18 ± 1 <sup>a</sup>    | 19 ± 1 <sup>a</sup>  | 23 ± 1 <sup>a</sup>  | 22 ± 1 <sup>a</sup>  | 19 ± 1 <sup>a</sup>   | 18 ± 1 <sup>a</sup>        | 1295 ± 52 <sup>a</sup>   |
| Egg         | 16 ± 1 <sup>a</sup>  | 17 ± 1 <sup>a</sup>    | 19 ± 1 <sup>a</sup>  | 20 ± 1 <sup>b</sup>  | 20 ± 1 <sup>b</sup>  | 18 ± 1 <sup>b</sup>   | 17 ± 1 <sup>b</sup>        | 868 ± 54 <sup>b</sup>    |
| Black beans | 16 ± 1 <sup>a</sup>  | 17 ± 1 <sup>a</sup>    | 16 ± 1 <sup>b</sup>  | 16 ± 1 <sup>c</sup>  | 16 ± 1 <sup>c</sup>  | 16 ± 1 <sup>c</sup>   | 16 ± 1 <sup>c</sup>        | 235 ± 53 <sup>c</sup>    |
| Almonds     | 16 ± 1 <sup>a</sup>  | 17 ± 1 <sup>a</sup>    | 16 ± 1 <sup>b</sup>  | 15 ± 1 <sup>c</sup>  | 15 ± 1 <sup>c</sup>  | 16 ± 1 <sup>c</sup>   | 16 ± 1 <sup>c</sup>        | 170 ± 53 <sup>c</sup>    |
|             | mg/dL                |                        |                      |                      |                      |                       | mg/dL*300 min              |                          |
| Glucose     |                      |                        |                      |                      |                      |                       |                            |                          |
| Pork        | 78 ± 1 <sup>a</sup>  | 88 ± 1 <sup>a</sup>    | 81 ± 1 <sup>a</sup>  | 78 ± 1 <sup>a</sup>  | 80 ± 1 <sup>a</sup>  | 82 ± 1 <sup>a</sup>   | 82 ± 1 <sup>a</sup>        | 1668 ± 148 <sup>a</sup>  |
| Egg         | 78 ± 1 <sup>a</sup>  | 88 ± 1 <sup>a</sup>    | 80 ± 1 <sup>a</sup>  | 77 ± 1 <sup>a</sup>  | 79 ± 1 <sup>a</sup>  | 81 ± 1 <sup>a</sup>   | 82 ± 1 <sup>a</sup>        | 1395 ± 151 <sup>a</sup>  |
| Black beans | 80 ± 1 <sup>a</sup>  | 91 ± 1 <sup>a</sup>    | 86 ± 1 <sup>b</sup>  | 79 ± 1 <sup>a</sup>  | 79 ± 1 <sup>a</sup>  | 81 ± 1 <sup>a</sup>   | 82 ± 1 <sup>a</sup>        | 1557 ± 149 <sup>a</sup>  |
| Almonds     | 80 ± 1 <sup>a</sup>  | 88 ± 1 <sup>a</sup>    | 82 ± 1 <sup>ab</sup> | 80 ± 1 <sup>a</sup>  | 79 ± 1 <sup>a</sup>  | 81 ± 1 <sup>a</sup>   | 82 ± 1 <sup>a</sup>        | 1164 ± 148 <sup>a</sup>  |
|             | μIU/mL               |                        |                      |                      |                      |                       | μIU/mL*300 min             |                          |



Effects of consuming ounce equivalent portions of animal- vs. plant-based Protein Foods, as defined by the Dietary Guidelines for Americans on essential amino acids bioavailability in young and older adults: crossover randomized controlled trials. Gavin Connolly

|                    |                            |                            |                            |                            |                            |                           |                           |                         |
|--------------------|----------------------------|----------------------------|----------------------------|----------------------------|----------------------------|---------------------------|---------------------------|-------------------------|
| <b>Insulin</b>     |                            |                            |                            |                            |                            |                           |                           |                         |
| <b>Pork</b>        | 11.3 ±<br>1.5 <sup>a</sup> | 29.8 ±<br>1.5 <sup>a</sup> | 29.1 ±<br>1.5 <sup>a</sup> | 16.4 ±<br>1.5 <sup>a</sup> | 12.6 ±<br>1.5 <sup>a</sup> | 9.4 ±<br>1.5 <sup>a</sup> | 7.8 ±<br>1.5 <sup>a</sup> | 1999 ± 169 <sup>a</sup> |
| <b>Egg</b>         | 9.7 ±<br>1.2 <sup>a</sup>  | 27.6 ±<br>1.2 <sup>a</sup> | 24.2 ±<br>1.2 <sup>b</sup> | 14.4 ±<br>1.2 <sup>a</sup> | 11.4 ±<br>1.2 <sup>a</sup> | 8.8 ±<br>1.2 <sup>a</sup> | 7.2 ±<br>1.2 <sup>a</sup> | 1749 ± 172 <sup>a</sup> |
| <b>Black beans</b> | 10.1 ±<br>1.4 <sup>a</sup> | 29.2 ±<br>1.4 <sup>a</sup> | 30.3 ±<br>1.4 <sup>a</sup> | 16.2 ±<br>1.4 <sup>a</sup> | 11.2 ±<br>1.4 <sup>a</sup> | 8.8 ±<br>1.4 <sup>a</sup> | 8.1 ±<br>1.4 <sup>a</sup> | 2062 ± 170 <sup>a</sup> |
| <b>Almonds</b>     | 10.0 ±<br>1.2 <sup>a</sup> | 29.2 ±<br>1.2 <sup>a</sup> | 23.5 ±<br>1.2 <sup>b</sup> | 13.2 ±<br>1.2 <sup>a</sup> | 9.3 ±<br>1.2 <sup>a</sup>  | 8.4 ±<br>1.2 <sup>a</sup> | 7.7 ±<br>1.2 <sup>a</sup> | 1588 ± 170 <sup>a</sup> |

<sup>1</sup> Values are least-squares means ± SE; n = 55 (30 females, 25 males). Plasma amino acids, glucose, and insulin concentrations were measured over 300 minutes. Data were analyzed using a doubly repeated measures ANOVA (proc mixed; SAS version 9.3). Differences in means were determined using a Bonferroni post hoc test. Trial-by-time interactions for TAAs, EAAs, BCAAs, leucine, and NEAAs were all significant, Tukey adjusted  $P < .001$ . TAA, total amino acids (sum of Ala, Arg, Apn, Asp, Cys, Gln, Glu, Gly, His, Ile, Leu, Lys, Met, Phe, Pro, Ser, Thr, Trp, Tyr, and Val); EAAs, essential amino acids (sum of His, Ile, Leu, Lys, Met, Phe, Thr, Trp, and Val); BCAAs, branched-chain amino acids (sum of Leu, Ile, and Val); NEAA, non-essential amino acids (sum of Ala, Arg, Asn, Asp, Cys, Gln, Glu, Gly, Pro, Ser, and Tyr); iAUCpos, positive incremental area under the curve.

<sup>2</sup> Values are least-squares means ± SE. Plasma amino acids, glucose, and insulin iAUCpos are reported over the 300-minute postprandial period with 0 minute time point used as baseline. Data were analyzed using a repeated measures ANOVA (proc mixed; SAS version 9.3) and differences in means were determined using a Bonferroni post hoc test, Bonferroni adjusted  $P < 0.05$ .

<sup>3</sup> Different superscript letters are significantly different from each other within time point, Bonferroni adjusted  $P < 0.05$ ; n = 55 (30 females, 25 males).

Effects of consuming ounce equivalent portions of animal- vs. plant-based Protein Foods, as defined by the Dietary Guidelines for Americans on essential amino acids bioavailability in young and older adults: crossover randomized controlled trials. Gavin Connolly

**Table S6.** Fasting and postprandial amino acids, glucose, and insulin concentrations and positive incremental areas under the curve for females.

|             | Time (mins)          |                      |                        |                      |                      |                       |                      | iAUCpos                    |
|-------------|----------------------|----------------------|------------------------|----------------------|----------------------|-----------------------|----------------------|----------------------------|
|             | 0                    | 30                   | 60                     | 120                  | 180                  | 240                   | 300                  |                            |
|             | μg/mL <sup>1</sup>   |                      |                        |                      |                      |                       |                      | μg/mL*300 min <sup>2</sup> |
| TAAs        |                      |                      |                        |                      |                      |                       |                      |                            |
| Pork        | 372 ± 9 <sup>a</sup> | 404 ± 9 <sup>a</sup> | 421 ± 9 <sup>abc</sup> | 489 ± 9 <sup>a</sup> | 448 ± 9 <sup>a</sup> | 412 ± 9 <sup>a</sup>  | 384 ± 9 <sup>a</sup> | 18070 ± 1078 <sup>a</sup>  |
| Egg         | 377 ± 8 <sup>a</sup> | 402 ± 8 <sup>a</sup> | 422 ± 8 <sup>b</sup>   | 441 ± 8 <sup>b</sup> | 428 ± 8 <sup>a</sup> | 403 ± 8 <sup>ab</sup> | 374 ± 8 <sup>a</sup> | 11310 ± 1044 <sup>b</sup>  |
| Black beans | 364 ± 7 <sup>a</sup> | 391 ± 7 <sup>a</sup> | 395 ± 7 <sup>c</sup>   | 402 ± 7 <sup>c</sup> | 389 ± 7 <sup>b</sup> | 379 ± 7 <sup>b</sup>  | 366 ± 7 <sup>a</sup> | 8047 ± 1062 <sup>bc</sup>  |
| Almonds     | 374 ± 8 <sup>a</sup> | 404 ± 8 <sup>a</sup> | 406 ± 8 <sup>abc</sup> | 399 ± 8 <sup>c</sup> | 385 ± 8 <sup>b</sup> | 379 ± 8 <sup>b</sup>  | 367 ± 8 <sup>a</sup> | 6656 ± 1096 <sup>c</sup>   |
| EAAs        |                      |                      |                        |                      |                      |                       |                      |                            |
| Pork        | 112 ± 3 <sup>a</sup> | 123 ± 3 <sup>a</sup> | 132 ± 3 <sup>a</sup>   | 163 ± 3 <sup>a</sup> | 158 ± 3 <sup>a</sup> | 143 ± 3 <sup>a</sup>  | 129 ± 3 <sup>a</sup> | 7346 ± 401 <sup>a</sup>    |
| Egg         | 114 ± 3 <sup>a</sup> | 123 ± 3 <sup>a</sup> | 130 ± 3 <sup>a</sup>   | 144 ± 3 <sup>b</sup> | 144 ± 3 <sup>b</sup> | 133 ± 3 <sup>a</sup>  | 122 ± 3 <sup>a</sup> | 4689 ± 413 <sup>b</sup>    |
| Black beans | 109 ± 2 <sup>a</sup> | 117 ± 2 <sup>a</sup> | 118 ± 2 <sup>b</sup>   | 119 ± 2 <sup>c</sup> | 119 ± 2 <sup>c</sup> | 116 ± 2 <sup>b</sup>  | 112 ± 2 <sup>b</sup> | 2023 ± 402 <sup>c</sup>    |
| Almonds     | 112 ± 2 <sup>a</sup> | 120 ± 2 <sup>a</sup> | 118 ± 2 <sup>b</sup>   | 116 ± 2 <sup>c</sup> | 115 ± 2 <sup>c</sup> | 115 ± 2 <sup>b</sup>  | 111 ± 2 <sup>b</sup> | 1184 ± 401 <sup>c</sup>    |
| BCAAs       |                      |                      |                        |                      |                      |                       |                      |                            |
| Pork        | 45 ± 2 <sup>a</sup>  | 50 ± 2 <sup>a</sup>  | 52 ± 2 <sup>a</sup>    | 67 ± 2 <sup>a</sup>  | 68 ± 2 <sup>a</sup>  | 62 ± 2 <sup>a</sup>   | 57 ± 2 <sup>a</sup>  | 4488 ± 208 <sup>a</sup>    |
| Egg         | 46 ± 2 <sup>a</sup>  | 49 ± 2 <sup>a</sup>  | 52 ± 2 <sup>a</sup>    | 59 ± 2 <sup>b</sup>  | 62 ± 2 <sup>b</sup>  | 58 ± 2 <sup>a</sup>   | 54 ± 2 <sup>a</sup>  | 3166 ± 206 <sup>b</sup>    |
| Black beans | 43 ± 1 <sup>a</sup>  | 46 ± 1 <sup>a</sup>  | 46 ± 1 <sup>b</sup>    | 47 ± 1 <sup>c</sup>  | 48 ± 1 <sup>c</sup>  | 47 ± 1 <sup>b</sup>   | 43 ± 1 <sup>b</sup>  | 1107 ± 207 <sup>c</sup>    |
| Almonds     | 44 ± 1 <sup>a</sup>  | 48 ± 1 <sup>a</sup>  | 46 ± 1 <sup>b</sup>    | 45 ± 1 <sup>c</sup>  | 45 ± 1 <sup>c</sup>  | 47 ± 1 <sup>b</sup>   | 46 ± 1 <sup>b</sup>  | 898 ± 213 <sup>c</sup>     |
| Leucine     |                      |                      |                        |                      |                      |                       |                      |                            |
| Pork        | 14 ± 1 <sup>a</sup>  | 16 ± 1 <sup>a</sup>  | 17 ± 1 <sup>a</sup>    | 22 ± 1 <sup>a</sup>  | 22 ± 1 <sup>a</sup>  | 19 ± 1 <sup>a</sup>   | 18 ± 1 <sup>a</sup>  | 1514 ± 68 <sup>a</sup>     |
| Egg         | 14 ± 1 <sup>a</sup>  | 16 ± 1 <sup>a</sup>  | 16 ± 1 <sup>a</sup>    | 18 ± 1 <sup>b</sup>  | 19 ± 1 <sup>b</sup>  | 17 ± 1 <sup>b</sup>   | 16 ± 1 <sup>b</sup>  | 920 ± 68 <sup>b</sup>      |
| Black beans | 14 ± 1 <sup>a</sup>  | 15 ± 1 <sup>a</sup>  | 15 ± 1 <sup>b</sup>    | 14 ± 1 <sup>c</sup>  | 15 ± 1 <sup>c</sup>  | 15 ± 1 <sup>c</sup>   | 15 ± 1 <sup>b</sup>  | 332 ± 68 <sup>c</sup>      |
| Almonds     | 14 ± 1 <sup>a</sup>  | 15 ± 1 <sup>a</sup>  | 14 ± 1 <sup>b</sup>    | 13 ± 1 <sup>c</sup>  | 14 ± 1 <sup>c</sup>  | 15 ± 1 <sup>c</sup>   | 14 ± 1 <sup>b</sup>  | 236 ± 70 <sup>c</sup>      |
|             | mg/dL                |                      |                        |                      |                      |                       |                      | mg/dL*300 min              |
| Glucose     |                      |                      |                        |                      |                      |                       |                      |                            |
| Pork        | 77 ± 2 <sup>a</sup>  | 86 ± 2 <sup>a</sup>  | 81 ± 2 <sup>a</sup>    | 77 ± 2 <sup>a</sup>  | 80 ± 2 <sup>a</sup>  | 81 ± 2 <sup>a</sup>   | 82 ± 2 <sup>a</sup>  | 1651 ± 195 <sup>a</sup>    |
| Egg         | 78 ± 2 <sup>a</sup>  | 86 ± 2 <sup>a</sup>  | 77 ± 2 <sup>a</sup>    | 77 ± 2 <sup>a</sup>  | 79 ± 2 <sup>a</sup>  | 82 ± 2 <sup>a</sup>   | 82 ± 2 <sup>a</sup>  | 1462 ± 193 <sup>a</sup>    |
| Black beans | 79 ± 2 <sup>a</sup>  | 89 ± 2 <sup>a</sup>  | 84 ± 2 <sup>a</sup>    | 79 ± 2 <sup>a</sup>  | 79 ± 2 <sup>a</sup>  | 81 ± 2 <sup>a</sup>   | 82 ± 2 <sup>a</sup>  | 1594 ± 193 <sup>a</sup>    |
| Almonds     | 78 ± 2 <sup>a</sup>  | 86 ± 2 <sup>a</sup>  | 80 ± 2 <sup>a</sup>    | 78 ± 2 <sup>a</sup>  | 79 ± 2 <sup>a</sup>  | 82 ± 2 <sup>a</sup>   | 82 ± 2 <sup>a</sup>  | 1229 ± 199 <sup>a</sup>    |
|             | μIU/mL               |                      |                        |                      |                      |                       |                      | μIU/mL*300 min             |

Effects of consuming ounce equivalent portions of animal- vs. plant-based Protein Foods, as defined by the Dietary Guidelines for Americans on essential amino acids bioavailability in young and older adults: crossover randomized controlled trials. Gavin Connolly

|                    |                         |                         |                           |                         |                         |                         |                        |                         |
|--------------------|-------------------------|-------------------------|---------------------------|-------------------------|-------------------------|-------------------------|------------------------|-------------------------|
| <b>Insulin</b>     |                         |                         |                           |                         |                         |                         |                        |                         |
| <b>Pork</b>        | 10.0 ± 2.0 <sup>a</sup> | 28.6 ± 2.0 <sup>a</sup> | 26.6 ± 2.0 <sup>abc</sup> | 14.7 ± 2.0 <sup>a</sup> | 12.0 ± 2.0 <sup>a</sup> | 10.2 ± 2.0 <sup>a</sup> | 7.3 ± 2.0 <sup>a</sup> | 2061 ± 224 <sup>a</sup> |
| <b>Egg</b>         | 8.8 ± 1.6 <sup>a</sup>  | 25.7 ± 1.6 <sup>a</sup> | 22.6 ± 1.6 <sup>ab</sup>  | 14.1 ± 1.6 <sup>a</sup> | 12.1 ± 1.6 <sup>a</sup> | 9.0 ± 1.6 <sup>a</sup>  | 7.1 ± 1.6 <sup>a</sup> | 1780 ± 223 <sup>a</sup> |
| <b>Black beans</b> | 8.9 ± 1.9 <sup>a</sup>  | 28.4 ± 1.9 <sup>a</sup> | 28.7 ± 1.9 <sup>c</sup>   | 15.1 ± 1.9 <sup>a</sup> | 10.0 ± 1.9 <sup>a</sup> | 7.8 ± 1.9 <sup>a</sup>  | 7.1 ± 1.9 <sup>a</sup> | 2045 ± 223 <sup>a</sup> |
| <b>Almonds</b>     | 9.0 ± 1.7 <sup>a</sup>  | 27.5 ± 1.7 <sup>a</sup> | 19.9 ± 1.7 <sup>d</sup>   | 10.6 ± 1.7 <sup>a</sup> | 8.5 ± 1.7 <sup>a</sup>  | 7.4 ± 1.7 <sup>a</sup>  | 7.0 ± 1.7 <sup>a</sup> | 1376 ± 227 <sup>a</sup> |

<sup>1</sup> Values are least-squares means ± SE; n = 30 females. Plasma amino acids, glucose, and insulin concentrations were measured over 300 minutes. Data were analyzed using a doubly repeated measures ANOVA (proc mixed; SAS version 9.3). Differences in means were determined using a Bonferroni post hoc test. Trial-by-time interactions for TAAs, EAAs, BCAAs, leucine, and NEAAs were all significant, Tukey adjusted  $P < .001$ . TAA, total amino acids (sum of Ala, Arg, Apn, Asp, Cys, Gln, Glu, Gly, His, Ile, Leu, Lys, Met, Phe, Pro, Ser, Thr, Trp, Tyr, and Val); EAAs, essential amino acids (sum of His, Ile, Leu, Lys, Met, Phe, Thr, Trp, and Val); BCAAs, branched-chain amino acids (sum of Leu, Ile, and Val); NEAA, non-essential amino acids (sum of Ala, Arg, Asn, Asp, Cys, Gln, Glu, Gly, Pro, Ser, and Tyr); iAUCpos, positive incremental area under the curve.

<sup>2</sup> Values are least-squares means ± SE. Plasma amino acids, glucose, and insulin iAUCpos are reported over the 300-minute postprandial period with 0 minute time point used as baseline. Data were analyzed using a repeated measures ANOVA (proc mixed; SAS version 9.3) and differences in means were determined using a Bonferroni post hoc test, Bonferroni adjusted  $P < 0.05$ .

<sup>3</sup> Different superscript letters are significantly different from each other within time point, Bonferroni adjusted  $P < 0.05$ ; n = 30).

Effects of consuming ounce equivalent portions of animal- vs. plant-based Protein Foods, as defined by the Dietary Guidelines for Americans on essential amino acids bioavailability in young and older adults: crossover randomized controlled trials. Gavin Connolly

**Table S7.** Fasting and postprandial amino acids, glucose, and insulin concentrations and positive incremental areas under the curve for males.

|                   | Time (mins)           |                       |                       |                       |                       |                       |                       | iAUC <sub>pos</sub>        |
|-------------------|-----------------------|-----------------------|-----------------------|-----------------------|-----------------------|-----------------------|-----------------------|----------------------------|
|                   | 0                     | 30                    | 60                    | 120                   | 180                   | 240                   | 300                   |                            |
|                   | μg/mL <sup>1</sup>    |                       |                       |                       |                       |                       |                       | μg/mL*300 min <sup>2</sup> |
| TAA <sub>s</sub>  |                       |                       |                       |                       |                       |                       |                       |                            |
| Pork              | 396 ± 10 <sup>a</sup> | 426 ± 10 <sup>a</sup> | 451 ± 10 <sup>a</sup> | 473 ± 10 <sup>a</sup> | 450 ± 10 <sup>a</sup> | 410 ± 10 <sup>a</sup> | 391 ± 10 <sup>a</sup> | 12947 ± 1155 <sup>a</sup>  |
| Egg               | 390 ± 9 <sup>a</sup>  | 413 ± 9 <sup>a</sup>  | 445 ± 9 <sup>a</sup>  | 447 ± 9 <sup>a</sup>  | 431 ± 9 <sup>a</sup>  | 396 ± 9 <sup>a</sup>  | 385 ± 9 <sup>a</sup>  | 9976 ± 1235 <sup>a</sup>   |
| Black beans       | 392 ± 8 <sup>a</sup>  | 402 ± 8 <sup>a</sup>  | 413 ± 8 <sup>b</sup>  | 406 ± 8 <sup>b</sup>  | 399 ± 8 <sup>b</sup>  | 386 ± 8 <sup>a</sup>  | 381 ± 8 <sup>a</sup>  | 4879 ± 1169 <sup>b</sup>   |
| Almonds           | 397 ± 8 <sup>a</sup>  | 417 ± 8 <sup>a</sup>  | 417 ± 8 <sup>ab</sup> | 399 ± 8 <sup>b</sup>  | 385 ± 8 <sup>b</sup>  | 384 ± 8 <sup>a</sup>  | 367 ± 8 <sup>a</sup>  | 3848 ± 1152 <sup>b</sup>   |
| EAA <sub>s</sub>  |                       |                       |                       |                       |                       |                       |                       |                            |
| Pork              | 127 ± 4 <sup>a</sup>  | 140 ± 4 <sup>a</sup>  | 151 ± 4 <sup>a</sup>  | 163 ± 4 <sup>a</sup>  | 155 ± 4 <sup>a</sup>  | 138 ± 4 <sup>a</sup>  | 132 ± 4 <sup>a</sup>  | 6603 ± 455 <sup>a</sup>    |
| Egg               | 129 ± 3 <sup>a</sup>  | 137 ± 3 <sup>a</sup>  | 149 ± 3 <sup>a</sup>  | 155 ± 3 <sup>a</sup>  | 150 ± 3 <sup>a</sup>  | 134 ± 3 <sup>a</sup>  | 131 ± 3 <sup>a</sup>  | 4692 ± 480 <sup>a</sup>    |
| Black beans       | 126 ± 2 <sup>a</sup>  | 130 ± 2 <sup>a</sup>  | 131 ± 2 <sup>b</sup>  | 129 ± 2 <sup>b</sup>  | 126 ± 2 <sup>b</sup>  | 122 ± 2 <sup>b</sup>  | 122 ± 2 <sup>a</sup>  | 1213 ± 460 <sup>b</sup>    |
| Almonds           | 129 ± 2 <sup>a</sup>  | 135 ± 2 <sup>a</sup>  | 133 ± 2 <sup>b</sup>  | 126 ± 2 <sup>b</sup>  | 124 ± 2 <sup>b</sup>  | 122 ± 2 <sup>b</sup>  | 122 ± 2 <sup>a</sup>  | 787 ± 455 <sup>b</sup>     |
| BCAA <sub>s</sub> |                       |                       |                       |                       |                       |                       |                       |                            |
| Pork              | 55 ± 2 <sup>a</sup>   | 60 ± 2 <sup>a</sup>   | 65 ± 2 <sup>a</sup>   | 71 ± 2 <sup>a</sup>   | 69 ± 2 <sup>a</sup>   | 61 ± 2 <sup>a</sup>   | 59 ± 2 <sup>a</sup>   | 3123 ± 231 <sup>a</sup>    |
| Egg               | 56 ± 2 <sup>a</sup>   | 60 ± 2 <sup>a</sup>   | 65 ± 2 <sup>a</sup>   | 70 ± 2 <sup>a</sup>   | 68 ± 2 <sup>a</sup>   | 61 ± 2 <sup>a</sup>   | 60 ± 2 <sup>a</sup>   | 2752 ± 244 <sup>a</sup>    |
| Black beans       | 56 ± 1 <sup>a</sup>   | 57 ± 1 <sup>a</sup>   | 57 ± 1 <sup>b</sup>   | 56 ± 1 <sup>b</sup>   | 55 ± 1 <sup>b</sup>   | 54 ± 1 <sup>b</sup>   | 53 ± 1 <sup>b</sup>   | 443 ± 234 <sup>b</sup>     |
| Almonds           | 57 ± 1 <sup>a</sup>   | 60 ± 1 <sup>a</sup>   | 59 ± 1 <sup>b</sup>   | 54 ± 1 <sup>b</sup>   | 355 ± 231 <sup>b</sup>     |
| Leucine           |                       |                       |                       |                       |                       |                       |                       |                            |
| Pork              | 18 ± 1 <sup>a</sup>   | 20 ± 1 <sup>a</sup>   | 21 ± 1 <sup>a</sup>   | 23 ± 1 <sup>a</sup>   | 22 ± 1 <sup>a</sup>   | 19 ± 1 <sup>a</sup>   | 19 ± 1 <sup>a</sup>   | 1075 ± 76 <sup>a</sup>     |
| Egg               | 18 ± 1 <sup>a</sup>   | 19 ± 1 <sup>a</sup>   | 21 ± 1 <sup>a</sup>   | 22 ± 1 <sup>a</sup>   | 21 ± 1 <sup>a</sup>   | 19 ± 1 <sup>ab</sup>  | 18 ± 1 <sup>ab</sup>  | 816 ± 80 <sup>a</sup>      |
| Black beans       | 18 ± 1 <sup>a</sup>   | 18 ± 1 <sup>a</sup>   | 18 ± 1 <sup>b</sup>   | 17 ± 1 <sup>b</sup>   | 17 ± 1 <sup>b</sup>   | 17 ± 1 <sup>b</sup>   | 16 ± 1 <sup>b</sup>   | 138 ± 77 <sup>b</sup>      |
| Almonds           | 18 ± 1 <sup>a</sup>   | 20 ± 1 <sup>a</sup>   | 19 ± 1 <sup>b</sup>   | 17 ± 1 <sup>ab</sup>  | 104 ± 76 <sup>b</sup>      |
|                   | mg/dL                 |                       |                       |                       |                       |                       |                       | mg/dL*300 min              |
| Glucose           |                       |                       |                       |                       |                       |                       |                       |                            |
| Pork              | 78 ± 2 <sup>a</sup>   | 90 ± 2 <sup>a</sup>   | 81 ± 2 <sup>a</sup>   | 78 ± 2 <sup>a</sup>   | 81 ± 2 <sup>a</sup>   | 83 ± 2 <sup>a</sup>   | 83 ± 2 <sup>a</sup>   | 1685 ± 216 <sup>a</sup>    |
| Egg               | 79 ± 2 <sup>a</sup>   | 90 ± 2 <sup>a</sup>   | 83 ± 2 <sup>a</sup>   | 77 ± 2 <sup>a</sup>   | 79 ± 2 <sup>a</sup>   | 81 ± 1 <sup>a</sup>   | 82 ± 2 <sup>a</sup>   | 1462 ± 229 <sup>a</sup>    |
| Black beans       | 81 ± 2 <sup>a</sup>   | 86± 2 <sup>a</sup>    | 80 ± 2 <sup>a</sup>   | 78 ± 2 <sup>a</sup>   | 79 ± 2 <sup>a</sup>   | 82 ± 2 <sup>a</sup>   | 82 ± 2 <sup>a</sup>   | 1594 ± 219 <sup>a</sup>    |
| Almonds           | 81 ± 2 <sup>a</sup>   | 89 ± 2 <sup>a</sup>   | 84 ± 2 <sup>a</sup>   | 81 ± 2 <sup>a</sup>   | 79 ± 2 <sup>a</sup>   | 81 ± 2 <sup>a</sup>   | 82 ± 2 <sup>a</sup>   | 1098 ± 216 <sup>a</sup>    |
|                   | μIU/mL                |                       |                       |                       |                       |                       |                       | μIU/mL*300 min             |

Effects of consuming ounce equivalent portions of animal- vs. plant-based Protein Foods, as defined by the Dietary Guidelines for Americans on essential amino acids bioavailability in young and older adults: crossover randomized controlled trials. Gavin Connolly

|                    |                  |                  |                    |                  |                  |                  |                  |                         |
|--------------------|------------------|------------------|--------------------|------------------|------------------|------------------|------------------|-------------------------|
| <b>Insulin</b>     |                  |                  |                    |                  |                  |                  |                  |                         |
| <b>Pork</b>        | 12.7 ±           | 31.1 ±           | 31.6 ±             | 18.9 ±           | 13.2 ±           | 8.6 ±            | 8.3 ±            | 1936 ± 250 <sup>a</sup> |
|                    | 2.2 <sup>a</sup> | 2.2 <sup>a</sup> | 2.2 <sup>abc</sup> | 2.2 <sup>a</sup> | 2.2 <sup>a</sup> | 2.2 <sup>a</sup> | 2.2 <sup>a</sup> |                         |
| <b>Egg</b>         | 10.8 ±           | 29.6 ±           | 25.9 ±             | 14.8 ±           | 10.6 ±           | 7.3 ±            | 7.4 ±            | 1717 ± 259 <sup>a</sup> |
|                    | 1.8 <sup>a</sup> | 1.8 <sup>a</sup> | 1.8 <sup>ab</sup>  | 1.8 <sup>a</sup> | 1.8 <sup>a</sup> | 1.8 <sup>a</sup> | 1.8 <sup>a</sup> |                         |
| <b>Black beans</b> | 11.4 ±           | 30.1 ±           | 31.9 ±             | 17.2 ±           | 12.5 ±           | 9.8 ±            | 8.9 ±            | 2078 ± 251 <sup>a</sup> |
|                    | 2.1 <sup>a</sup> | 2.1 <sup>a</sup> | 2.1 <sup>ac</sup>  | 2.1 <sup>a</sup> | 2.1 <sup>a</sup> | 2.1 <sup>a</sup> | 2.1 <sup>a</sup> |                         |
| <b>Almonds</b>     | 11.1 ±           | 30.9 ±           | 27.0 ±             | 15.9 ±           | 10.1 ±           | 9.5 ±            | 8.5 ±            | 1799 ± 249 <sup>a</sup> |
|                    | 1.8 <sup>a</sup> | 1.8 <sup>a</sup> | 1.8 <sup>abc</sup> | 1.8 <sup>a</sup> | 1.8 <sup>a</sup> | 1.8 <sup>a</sup> | 1.8 <sup>a</sup> |                         |

<sup>1</sup> Values are least-squares means ± SE; n = 25 males. Plasma amino acids, glucose, and insulin concentrations were measured over 300 minutes. Data were analyzed using a doubly repeated measures ANOVA (proc mixed; SAS version 9.3). Differences in means were determined using a Bonferroni post hoc test. Trial-by-time interactions for TAAs, EAAs, BCAAs, leucine, and NEAAs were all significant, Tukey adjusted  $P < .001$ . TAA, total amino acids (sum of Ala, Arg, Apn, Asp, Cys, Gln, Glu, Gly, His, Ile, Leu, Lys, Met, Phe, Pro, Ser, Thr, Trp, Tyr, and Val); EAAs, essential amino acids (sum of His, Ile, Leu, Lys, Met, Phe, Thr, Trp, and Val); BCAAs, branched-chain amino acids (sum of Leu, Ile, and Val); NEAA, non-essential amino acids (sum of Ala, Arg, Asn, Asp, Cys, Gln, Glu, Gly, Pro, Ser, and Tyr); iAUCpos, positive incremental area under the curve.

<sup>2</sup> Values are least-squares means ± SE. Plasma amino acids, glucose, and insulin iAUCpos are reported over the 300-minute postprandial period with 0 minute time point used as baseline. Data were analyzed using a repeated measures ANOVA (proc mixed; SAS version 9.3) and differences in means were determined using a Bonferroni post hoc test, Bonferroni adjusted  $P < 0.05$ .

<sup>3</sup> Different superscript letters are significantly different from each other within time point, Bonferroni adjusted  $P < 0.05$ ; n = 25.
